# Supplementary material
Source: publisher figshare collection journal article supplement (https://acs.figshare.com/ndownloader/files/4242301)
Supplement: Supplementary file 1 [file 4242301]

# Supporting Information for

## Polymer-coated NaYF<sub>4</sub>:Yb<sup>3+</sup>, Er<sup>3+</sup> Upconversion

## Nanoparticles for Charge-dependent Cellular

## Imaging

*Jiefu Jin<sup>‡</sup>, Yan-Juan Gu<sup>†</sup>, Cornelia Wing-Yin Man<sup>†</sup>, Jinping Cheng<sup>§</sup>, Zhenhua Xu<sup>‡</sup>, Yue Zhang<sup>‡</sup>,  
Huaishan Wang<sup>†</sup>, Vien Hoi-Yi Lee<sup>†</sup>, Shuk Han Cheng<sup>§</sup>, and Wing-Tak Wong<sup>†,||,\*</sup>*

<sup>†</sup>Department of Applied Biology and Chemical Technology, The Hong Kong Polytechnic  
University, Hung Hom, Kowloon, Hong Kong

<sup>‡</sup>Department of Chemistry, The University of Hong Kong, Pokfulam Road, Hong Kong

<sup>§</sup>Department of Biology and Chemistry, City University of Hong Kong, Hong Kong

<sup>||</sup>PearL Materia Medica Development (Shenzhen) Ltd., Shenzhen 518057, China

\* To whom correspondence should be addressed. E-mail: bcwtwong@polyu.edu.hk Telephone:  
(852) 3440-8789. Fax: (852) 2364-9932.

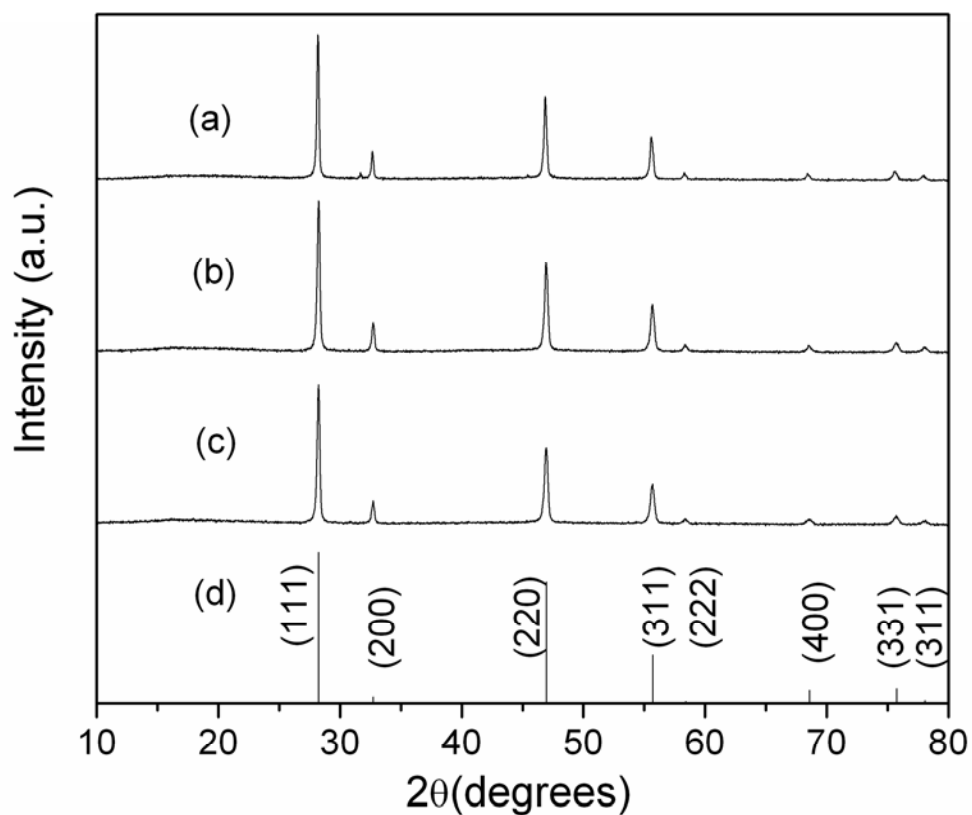

Figure S1. X-ray power diffraction (XRD) spectra of NaYF<sub>4</sub>:Yb<sup>3+</sup>, Er<sup>3+</sup> NPs with various polymer coatings (a) UCNP-PEI, (b) UCNP-PVP, (c) UCNP-PAA, (d) Line pattern of the calculated cubic phase of NaYF<sub>4</sub> (PDF 77-2042).

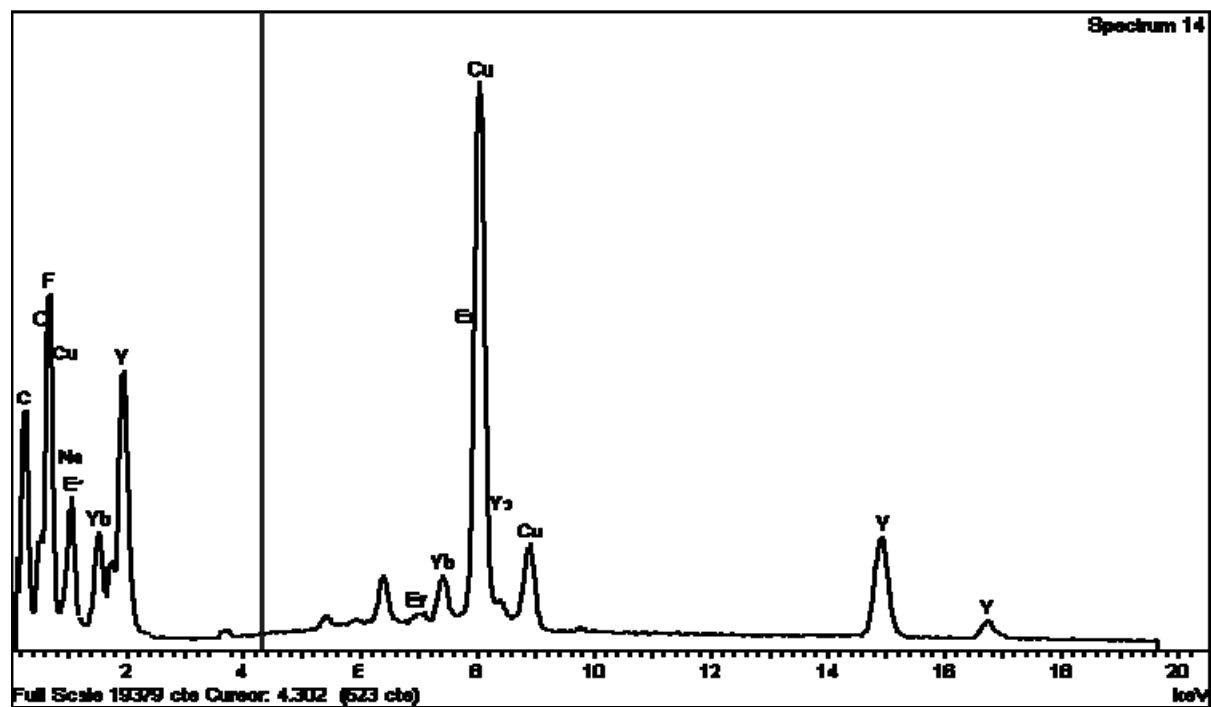

| Element | Peak   | Area  | k      | Abs    | Weight% | Weight% | Atomic% |
|---------|--------|-------|--------|--------|---------|---------|---------|
|         | Area   | Sigma | factor | Corrn. |         | Sigma   |         |
| C K     | 75145  | 844   | 2.208  | 1.213  | 15.80   | 0.16    | 38.86   |
| O K     | 29700  | 637   | 1.810  | 1.078  | 4.55    | 0.09    | 8.40    |
| F K     | 118170 | 793   | 1.574  | 1.040  | 15.18   | 0.10    | 23.60   |
| Na K    | 45865  | 624   | 1.237  | 1.049  | 4.67    | 0.06    | 6.00    |
| Cu K    | 337660 | 1119  | 1.366  | 0.970  | 35.12   | 0.14    | 16.33   |
| Y K     | 85222  | 707   | 2.467  | 0.970  | 16.01   | 0.12    | 5.32    |
| Er L    | 7802   | 763   | 2.226  | 0.971  | 1.32    | 0.13    | 0.23    |
| Yb L    | 42134  | 846   | 2.290  | 0.971  | 7.35    | 0.14    | 1.25    |
| Totals  |        |       |        |        | 100.00  |         |         |

Figure S2. EDX spectrum of UCNP-PVP (upper) and the corresponding quantitative analysis as shown in the table list (lower).

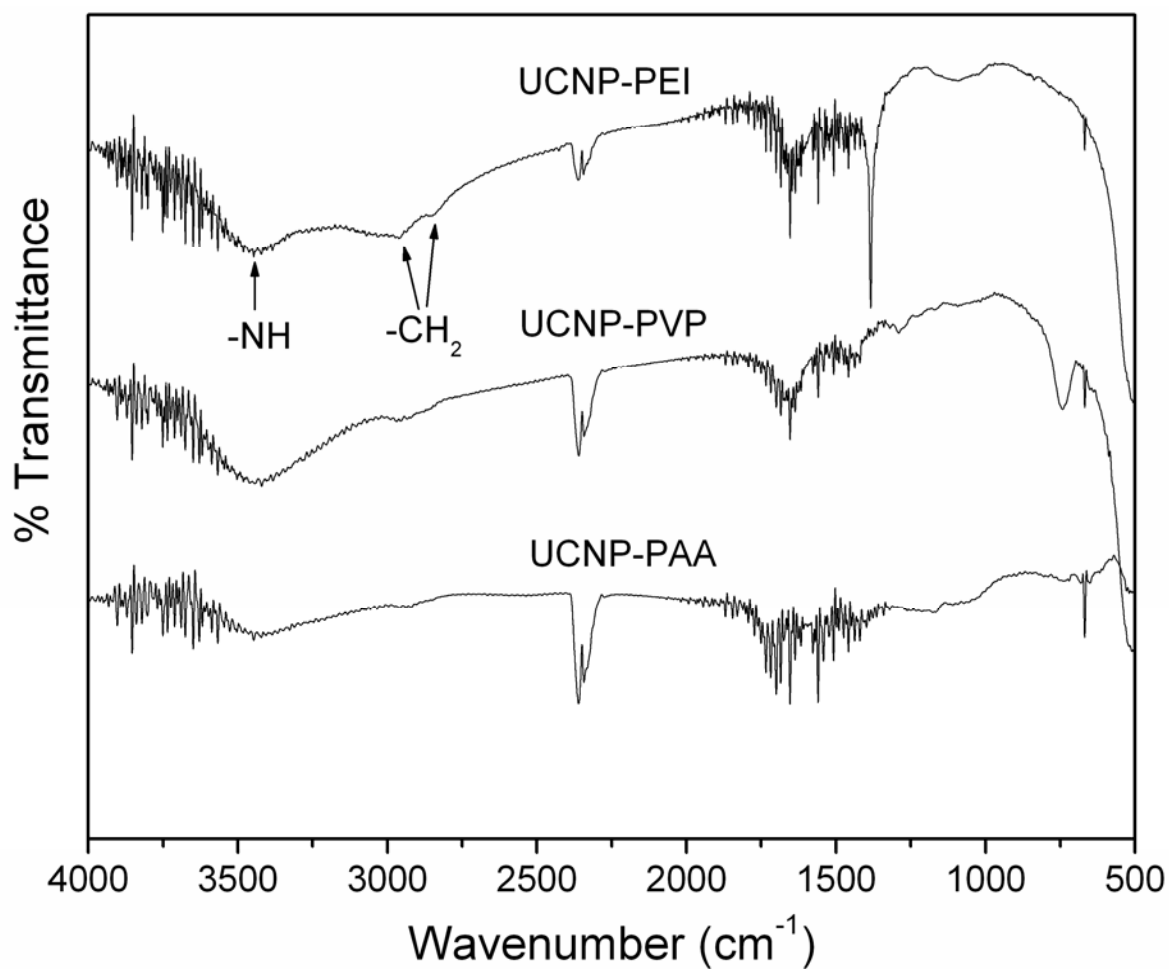

Figure S3. FT-IR spectra of NaYF<sub>4</sub>:Yb<sup>3+</sup>, Er<sup>3+</sup> NPs with various polymer coatings.

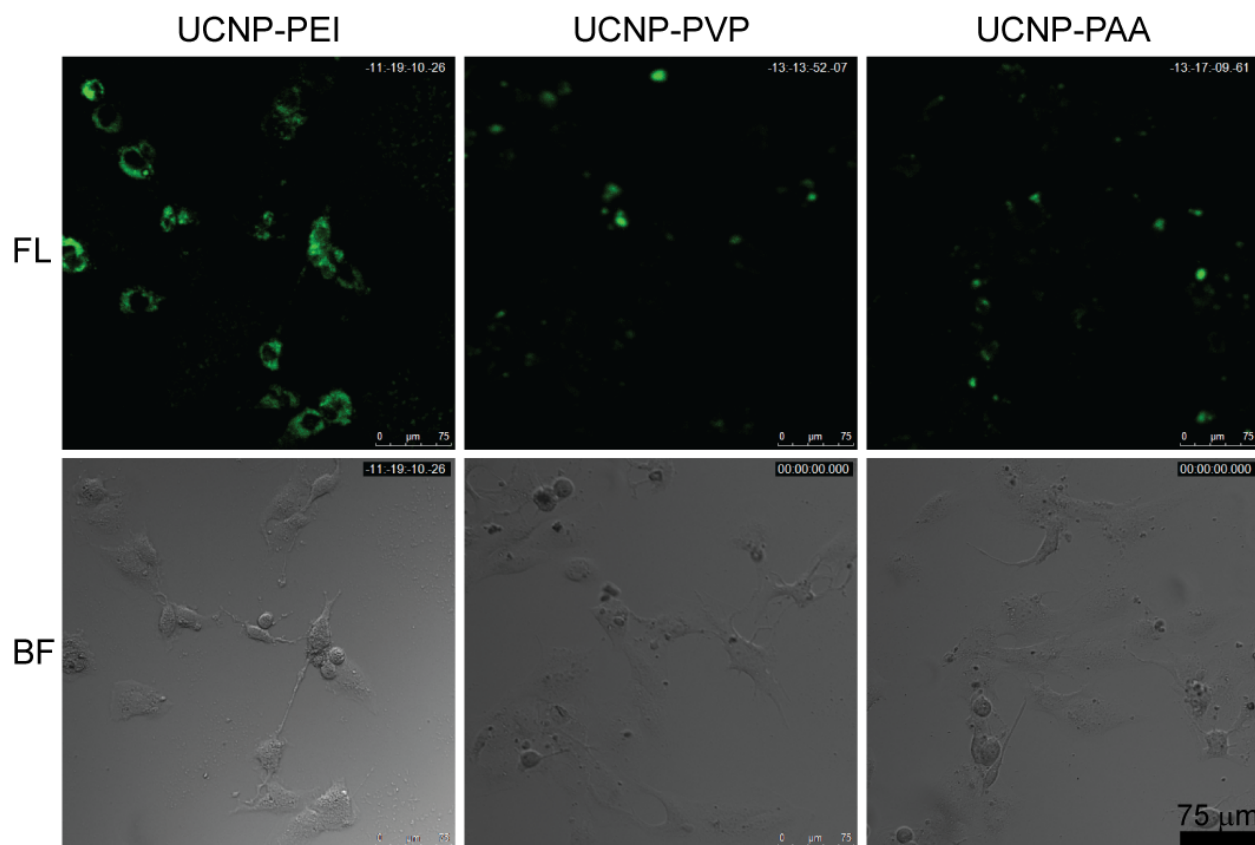

Figure S4. Multiphoton confocal fluorescent (upper) and bright field (lower) images of U87MG cells incubated with 50  $\mu\text{g/ml}$  UCNP-PEI (left panel), UCNP-PVP (middle panel) and UCNP-PAA (right panel). The 980 nm excitation was provided by a femto-second Ti:sapphire pulsed laser, and the green emissions of 540–560 nm were acquired by a PMT channel (10 $\times$  lens, scale bar = 75  $\mu\text{m}$ ).

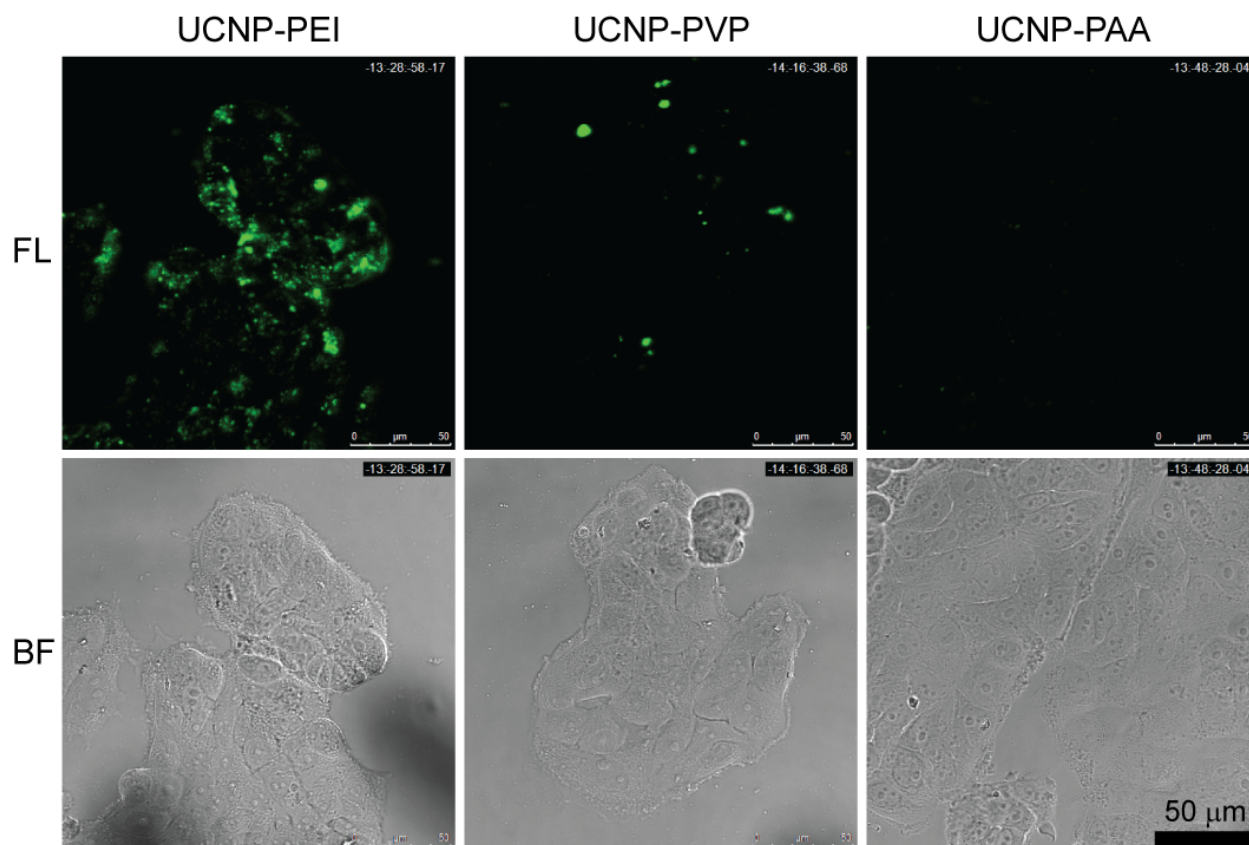

Figure S5. Multiphoton confocal fluorescent (upper) and bright field (lower) images of MCF-7 cells incubated with 50  $\mu\text{g}/\text{ml}$  UCNP-PEI (left panel), UCNP-PVP (middle panel) and UCNP-PAA (right panel). The 980 nm excitation was provided from a femto-second Ti:sapphire pulsed laser, and the green emissions of 540–560 nm were acquired by a PMT channel (40 $\times$  oil lens, scale bar = 50  $\mu\text{m}$ ).

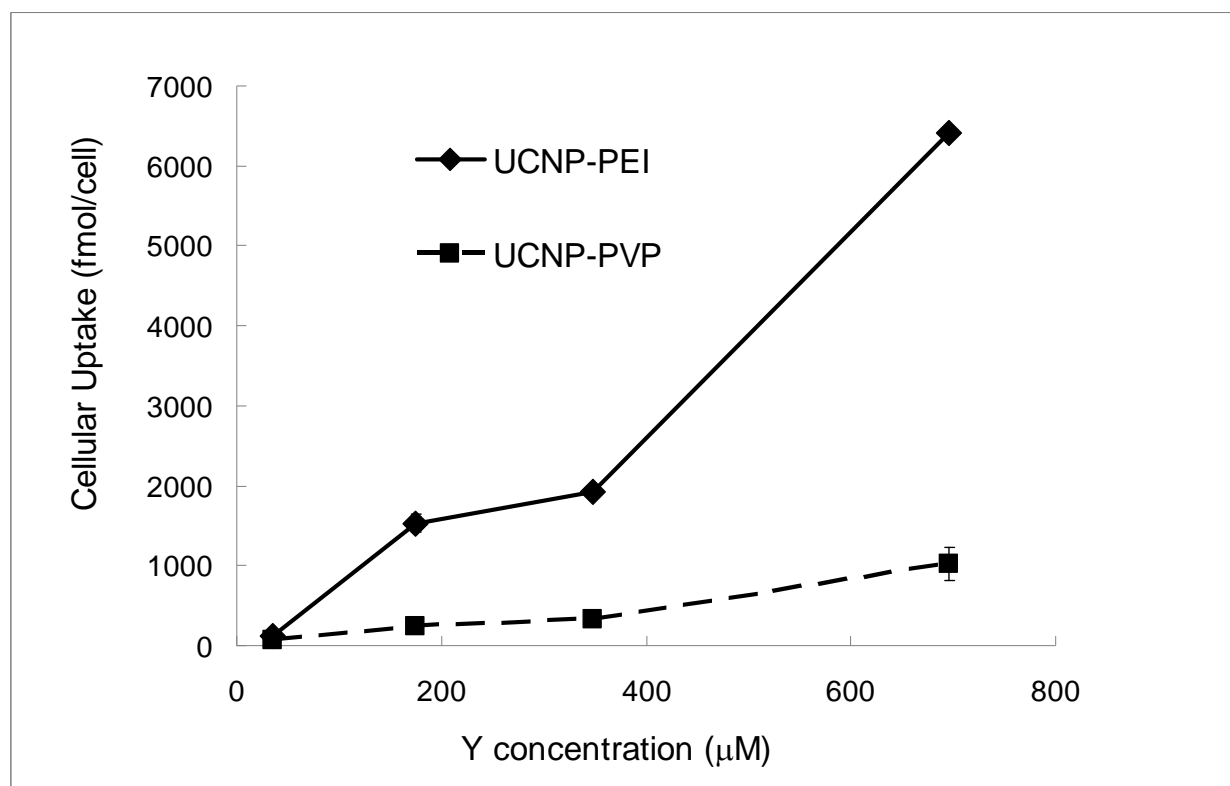

Figure S6. Average molar numbers of yttrium taken by an U87MG cell (fmol/cell) were determined by ICP-MS. U87MG cells were treated with the polymer coated UCNPs with yttrium concentrations ranging from 50  $\mu\text{M}$  to 400  $\mu\text{M}$  at 37  $^{\circ}\text{C}$  for 24 h. Each data point was represented as mean  $\pm$  SD from triplicate trials.

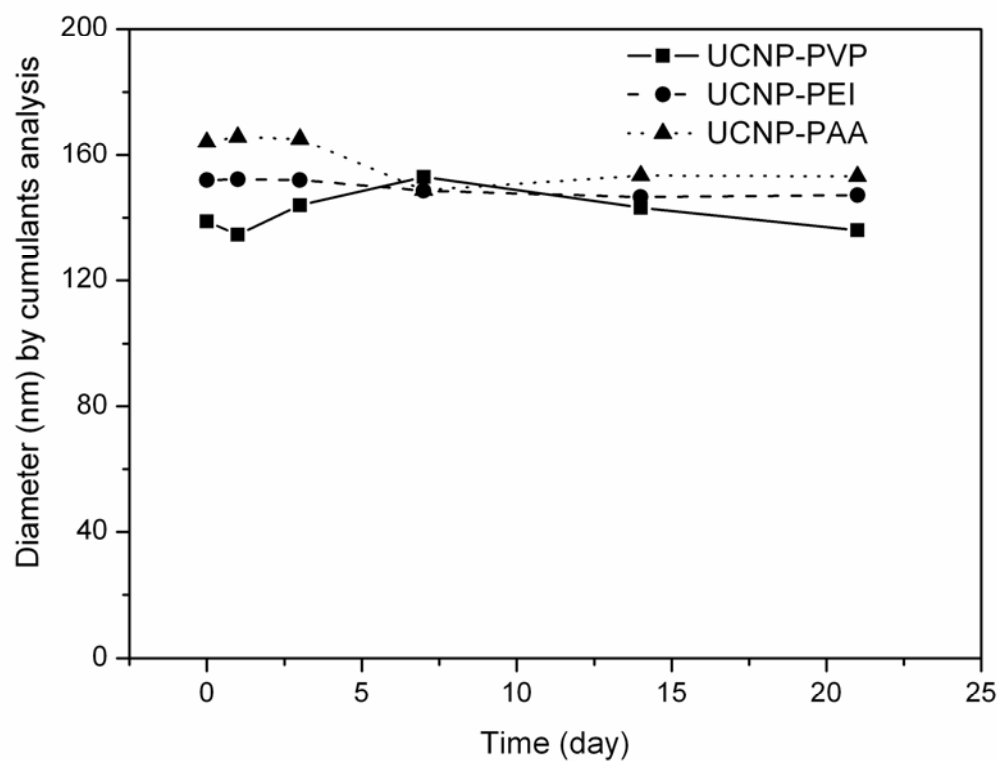

Figure S7. Long term stability test of UCNP-PVP (solid line), UCNP-PEI (dashed line) and UCNP-PAA (dotted line) with a dispersion concentration of 1 mg/mL in aqueous solution.



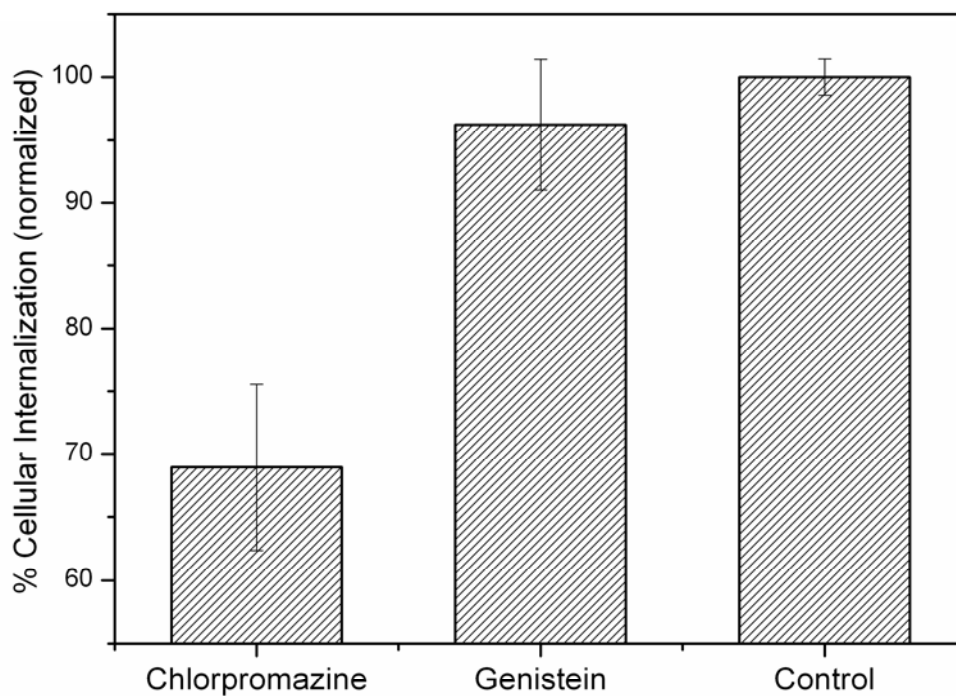

Figure S8. Probing the uptake pathways of UCNP-PEI using chemical endocytic inhibitors. HeLa cells were incubated with chlorpromazine and genistein for the inhibition of clathrin- and caveolae-mediated endocytosis, respectively. HeLa cells treated with UCNP-PEI without inhibitors were used as controls.
